# Supplementary material for: De novo assembly and characterization of leaf transcriptome for the development of functional molecular markers of the extremophile multipurpose tree species Prosopis alba
Source: PubMed Central journal article supplement (PMC4008253; doi:10.1186/1471-2164-14-705), 2013-10-14
Supplement: 1471-2164-14-705-S1.pdf [file 1471-2164-14-705-S1.pdf]

# *Prosopis alba* cDNA library

Leaf tissue, 3 individuals

## 454 GS FLX Titanium Pyrosequencing

(1,103,231 raw reads, average length 421 bp)

Filtering for adaptors,  
primer sequences and  
low-quality sequences

### Chloroplast Assembly

44,079 reads

(BLASTN e-50 TBLASTX e-10)

(AMOScmp)

### Assembly

1,063,520 high quality reads

(Newbler 2.5)

15,814 isotigs  
Average length 991 bp  
(12,610 isogroups)

71,101 singletons

Average length 288 bp

Clustering  
(CD-HIT-454  
algorithm to  
eliminate artificial  
duplicates)

39,000 singletons

54,814 unigenes

>200bp

BLASTX  
(e-value  $\leq 10e-10$ )  
Blast2GO  
Interproscan-Kass-  
BlastP- TblastX

SSR webservice  
GDR, SSAHASNP  
Program

37,563  
Unigenes with  
putative  
function

6,236 SNPs  
6,147 in unigenes  
with function

5,992 SSRs  
3,440 in  
unigenes with  
function

11 Nuclear  
polymorphic  
SSR in stress  
genes: wet lab  
validated

123 Nuclear  
polymorphic SSRs  
*In silico* (135 GO  
terms)
